# Supplementary material
Source: publisher figshare collection journal article supplement (https://acs.figshare.com/ndownloader/files/13332119)
Supplement: Supplementary file 1 [file 13332119]

Self-Assembly Precursor-Derived MoP Supported  
on N,P-Codoped Reduced Graphene Oxides as  
Efficient Catalysts for Hydrogen Evolution Reaction

*Juntao Zhang, Xingdong Wang, Yanrong Xue, Zhiyuan Xu, Jiajing Pei and Zhongbin Zhuang\**

**Supporting Information**

### **Preparation of the control samples.**

*Synthesis of MoP nanoparticles.* The synthesis method for MoP nanoparticles was the same as the MoP/N,P-rGO except removing GO.

*Synthesis of MoP/rGO.* 20 mg of GO were dissolved in 4 mL of deionized water and sonicated for at least 30 min to form a homogeneous mixture. Then 50 mg of ammonium molybdate was added, and followed by adding 16 mL of ethylene glycol. This mixture was further sonicated for another 30 min, and then transferred into a 40 mL Teflon-lined autoclave. The autoclave placed in oven and hold at 200 °C for 24 h. After the temperature cooled down to room temperature, the precipitate was collected and washed with deionized water and ethanol for several times, and dried at 60 °C for 12 h. The products were placed in a quartz tube with 1 g of  $\text{NaH}_2\text{PO}_2$ , and the quartz tube was vacuumed. Then the quartz tube heated to 800 °C and maintained at this temperature for 2 h. After cooling to room temperature, the products collected and washed with deionized water.

*Synthesis of N-rGO.* The synthesis method for N-rGO was same as the MoP/N,P-rGO except removing phosphomolybdic acid and phytic acid.

*Synthesis of N,P-rGO.* The synthesis method for N,P-rGO was same as the MoP/N,P-rGO except removing phosphomolybdic acid.

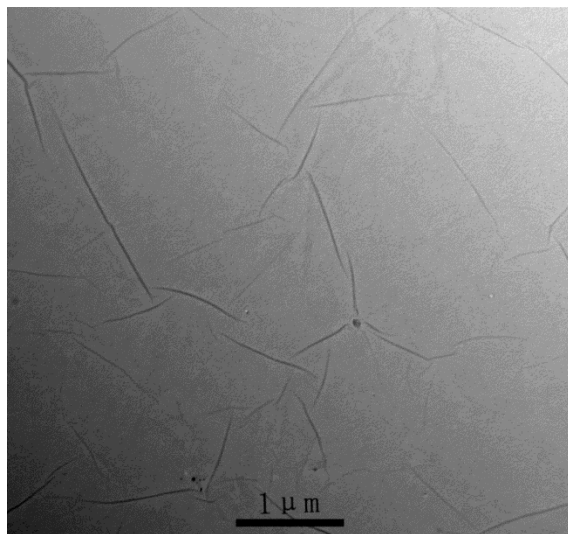

**Figure S1.** TEM image of GO.

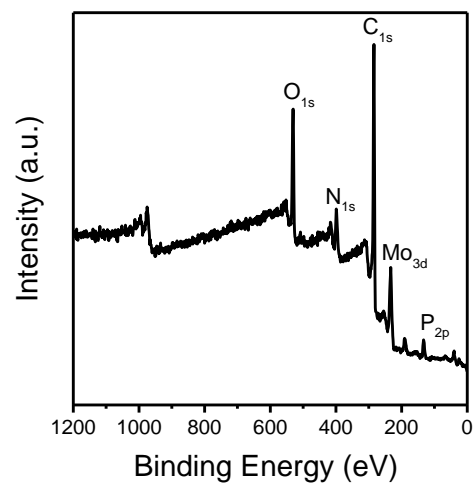

**Figure S2.** XPS survey scan of MoP/N,P-rGO.

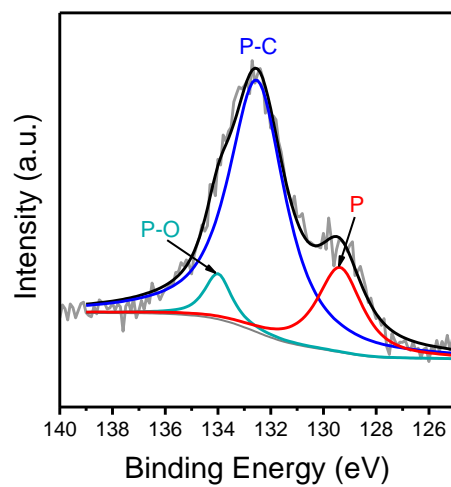

**Figure S3.** XPS P 2p core level spectra of N,P-rGO.

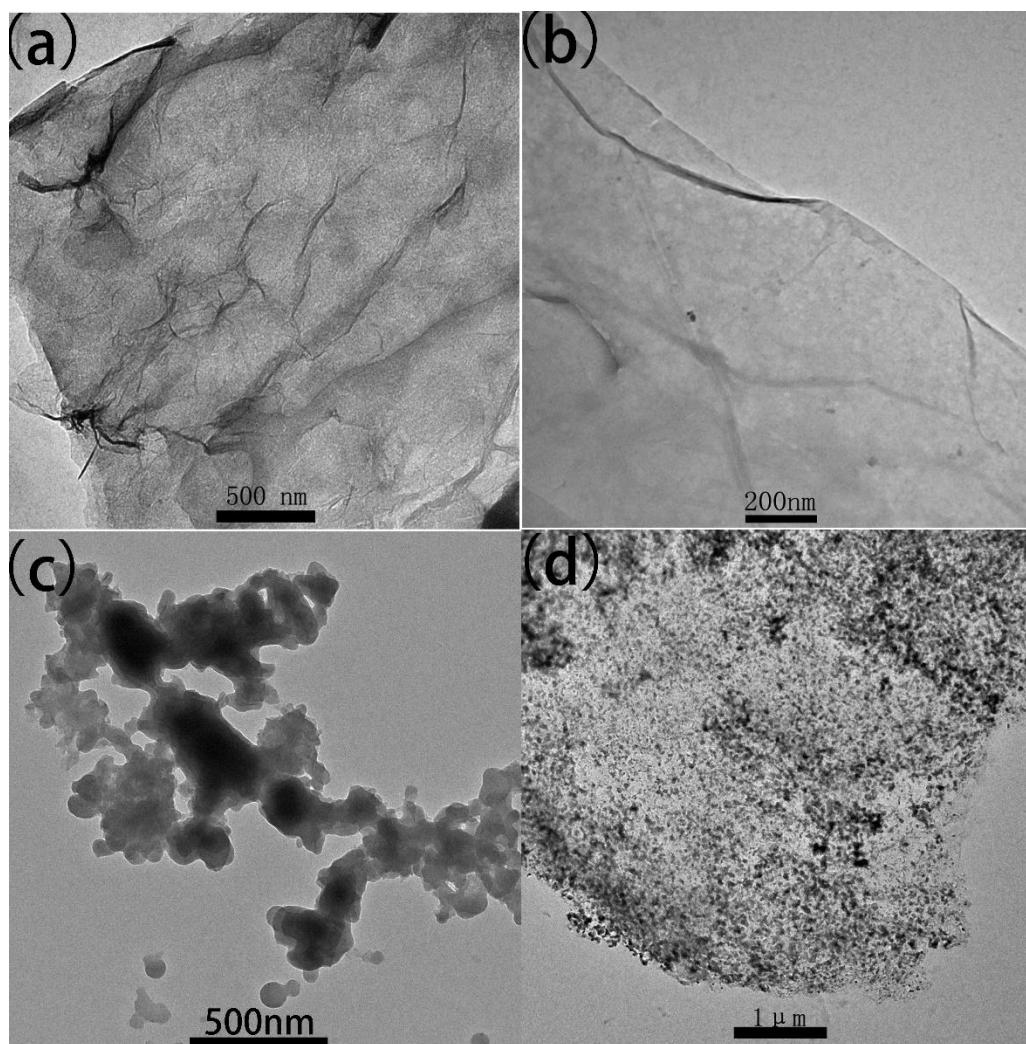

**Fig. S4** TEM images of (a-d) NrGO, N,P-rGO, MoP NP and MoP/rGO.

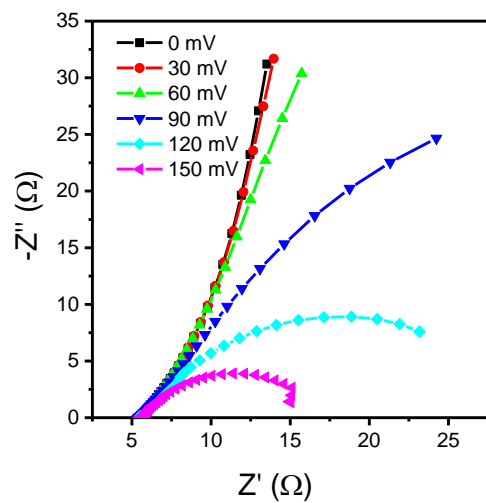

**Fig. S5.** Nyquist plots of MoP/N,P-rGO at an different overpotential.

**Table S1.** Comparison of electrocatalytic performance of MoP-based HER catalysts

| Catalysts                           | Loadings<br>(mg cm <sup>-1</sup> ) | Overpotential<br>@ 10 mA cm <sup>-2</sup><br>(mV) | Tafel slope<br>(mV dec <sup>-1</sup> ) | Reference                                                                    |
|-------------------------------------|------------------------------------|---------------------------------------------------|----------------------------------------|------------------------------------------------------------------------------|
| MoP/N,P-rGO                         | 0.41                               | 115                                               | 54                                     | <b>This work</b>                                                             |
| MoP@C@rGO                           | 0.7                                | 168                                               | 79                                     | <i>ACS Appl. Mater. Interfaces</i> <b>2018</b> , DOI: 10.1021/acsami.8b07133 |
| MoP@HCC                             | 0.26                               | 129                                               | 48                                     | <i>Nanoscale</i> <b>2018</b> , 10, 14594-14599                               |
| MoP@NPC-H                           | 0.5                                | 141                                               | 59                                     | <i>ACS Sustainable Chem. Eng.</i> <b>2018</b> , 6, 7676-7686                 |
| MoP@PC                              | 0.14                               | 258                                               | 59                                     | <i>ACS Appl. Mater. Interfaces</i> <b>2018</b> , 20, 17140-17146             |
| MoP@PC-rGO                          | 0.14                               | 234                                               | 54                                     | <i>ACS Sustainable Chem. Eng.</i> 2018, DOI:10.1021/acssuschemeng.8b01575    |
| MoP/rGO                             | 1.6                                | 152                                               | 88                                     | <i>Cataly Sci Tech</i> , <b>2017</b> , 668-676.                              |
| MoP@NPC/rGO                         | 0.4                                | 218                                               | 57                                     | <i>Chem. Commun.</i> <b>2017</b> , 53, 12576-12579                           |
| MoP/SN                              | 0.5                                | 104 <sup>a</sup>                                  | 45                                     | <i>ACS Catal.</i> <b>2017</b> , 7, 3030-3038                                 |
| MoP/SNG-20                          | 0.5                                | 99 <sup>a</sup>                                   | 54                                     |                                                                              |
| MoP NPs@NC                          | 2                                  | 115                                               | 65                                     | <i>Nanoscale</i> <b>2016</b> , 8, 17256-17261                                |
| MoS <sub>0.2</sub> P <sub>0.8</sub> | 0.28                               | 120 <sup>a</sup>                                  | 57                                     | <i>Adv. Mater.</i> <b>2016</b> , 28, 1427-1432                               |
| MoP <sub>2</sub> /CC                | 7.8                                | 58                                                | 63                                     | <i>J. Mater. Chem. A</i> <b>2016</b> , 4, 7169-7173                          |
| MoP@RGO                             | 0.285                              | 98                                                | 58                                     | <i>J. Am. Chem. Soc.</i> <b>2016</b> , 138, 14686-14693                      |
| MoP/Ti                              | 1                                  | 117                                               | 50                                     | <i>Angew. Chem. In .Ed.</i> <b>2014</b> , 53, 14433-14437                    |
| MoP S                               | 1                                  | 86                                                | 50                                     |                                                                              |
| MoP S                               | 3                                  | 64                                                | 50                                     |                                                                              |
| MoP                                 | 0.36                               | 125                                               | 54                                     | <i>Adv. Mater.</i> <b>2014</b> , 26, 5702-5707                               |

a. using Pt wire as the counter electrode. The others used graphite rod as the counter electrode.
